# Supplementary material for: A novel LC-MS/MS method for simultaneous estimation of acalabrutinib and its active metabolite acalabrutinib M27 in human plasma and application to a human pharmacokinetic study
Source: Royal Society of Chemistry journal article supplement (doi:10.1039/d1ra09026g), 2022-01-01
Supplement: d1ra09026g2.pdf [file d1ra09026g2.pdf]

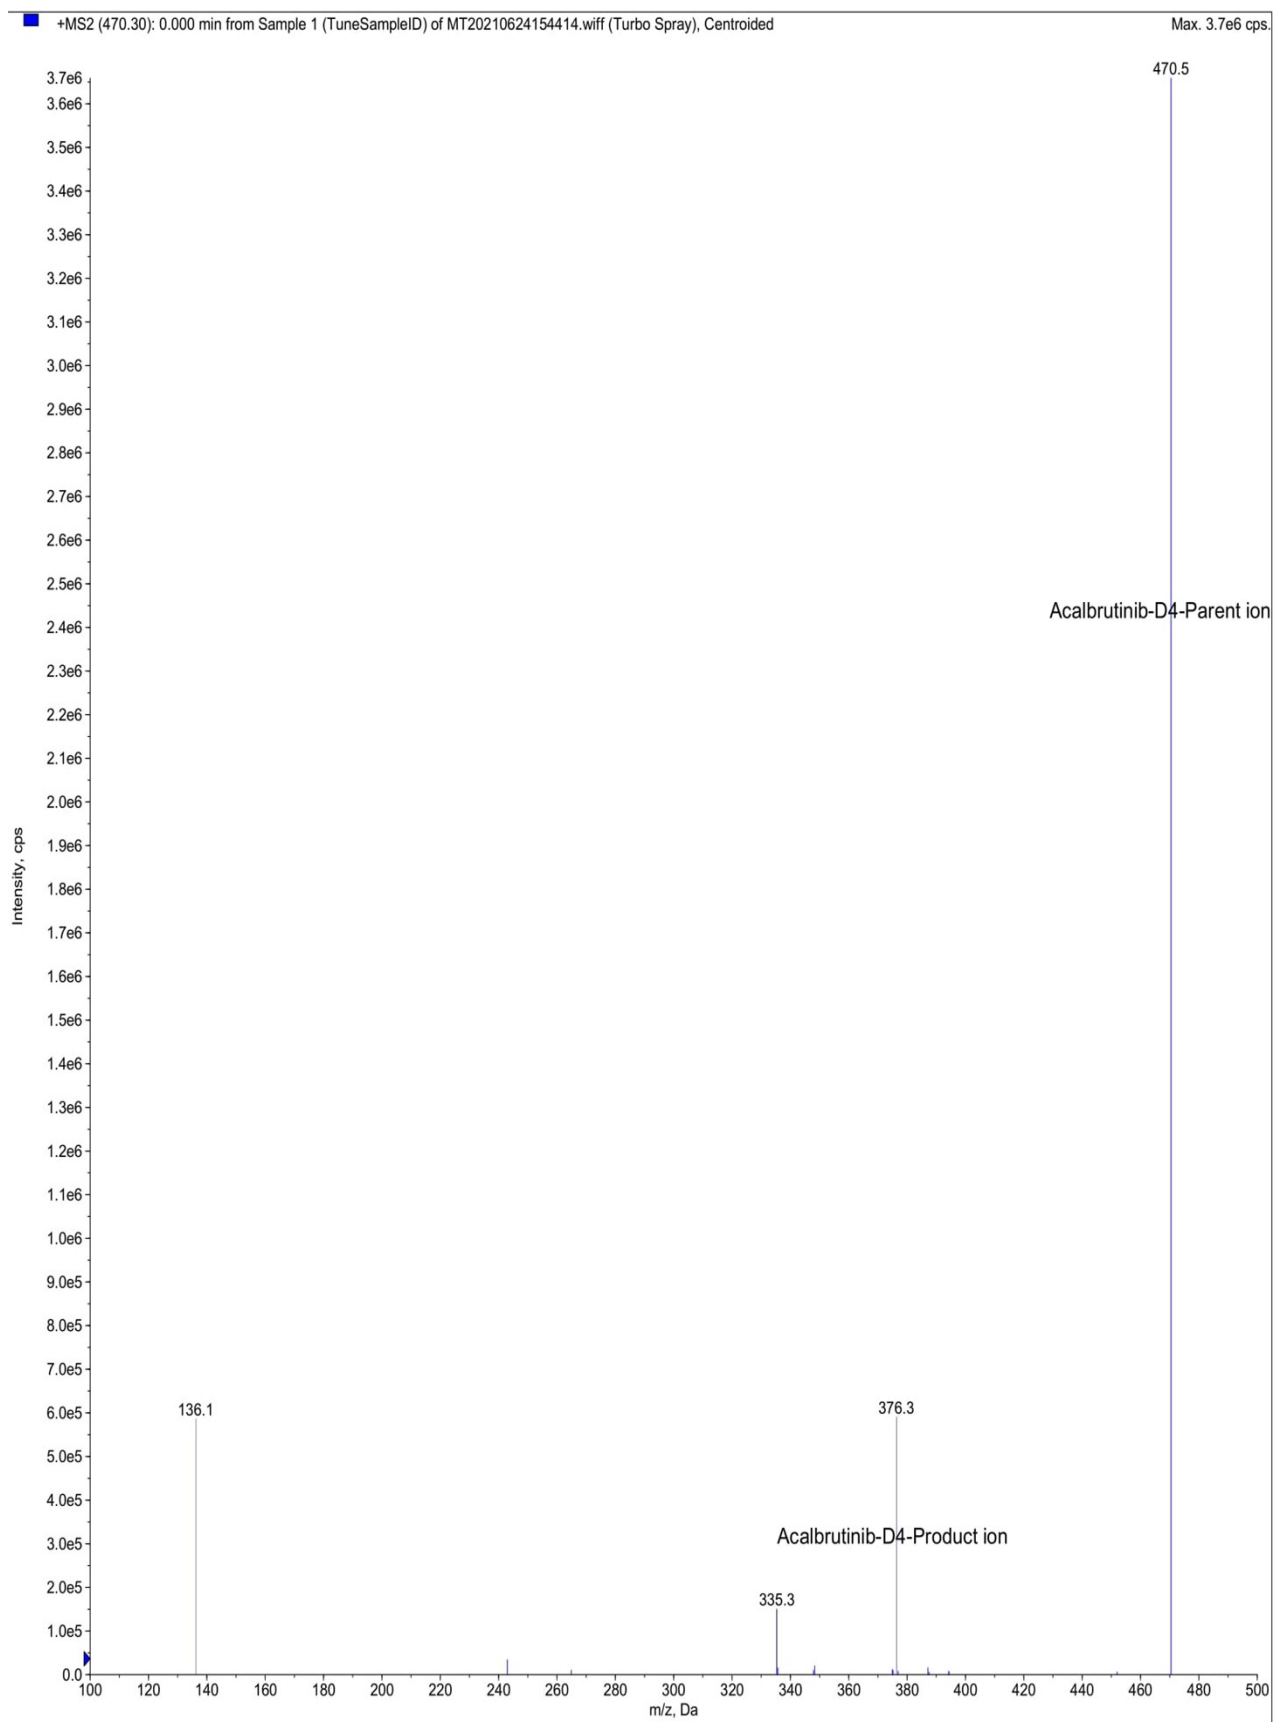

A)

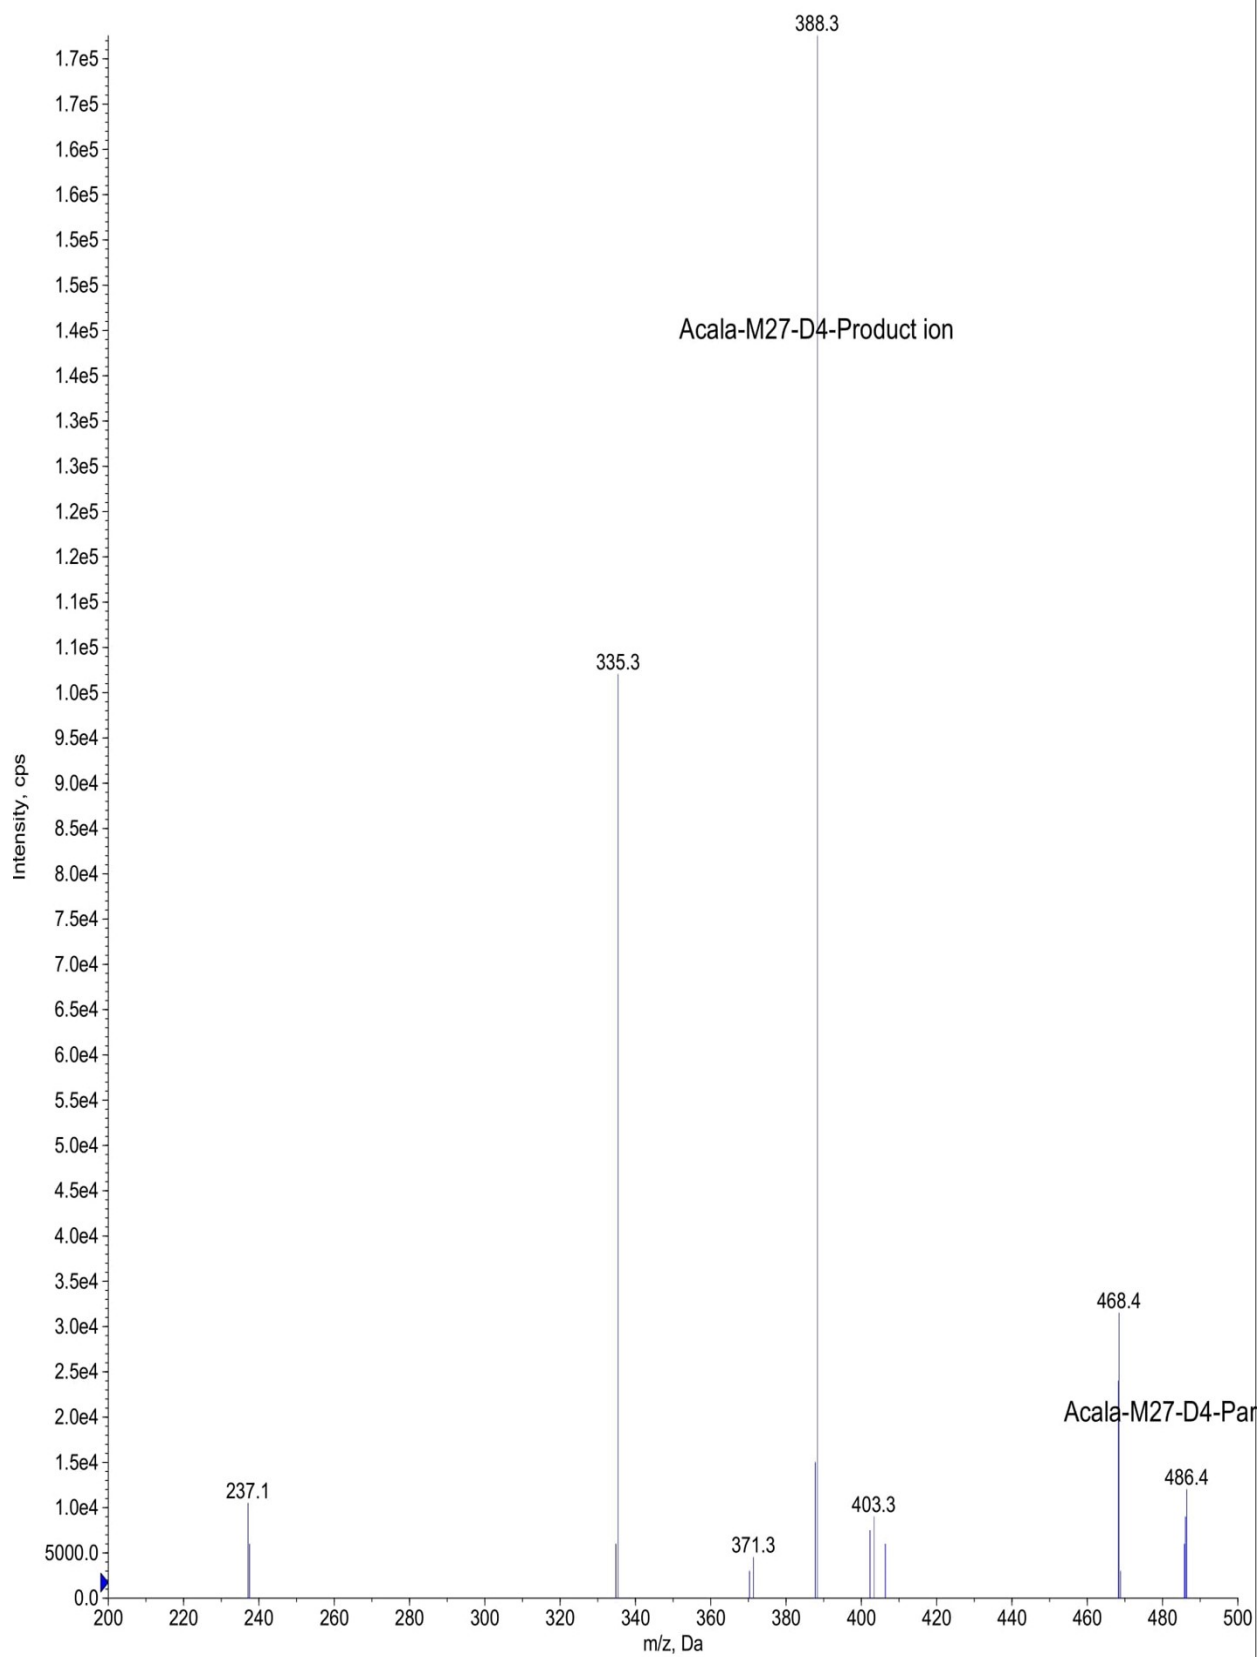

B)

+MS2 (482.30): 0.000 min from Sample 1 (TuneSampleID) of MT20210624171339.wiff (Turbo Spray), ...

Max. 1.4e5 cps

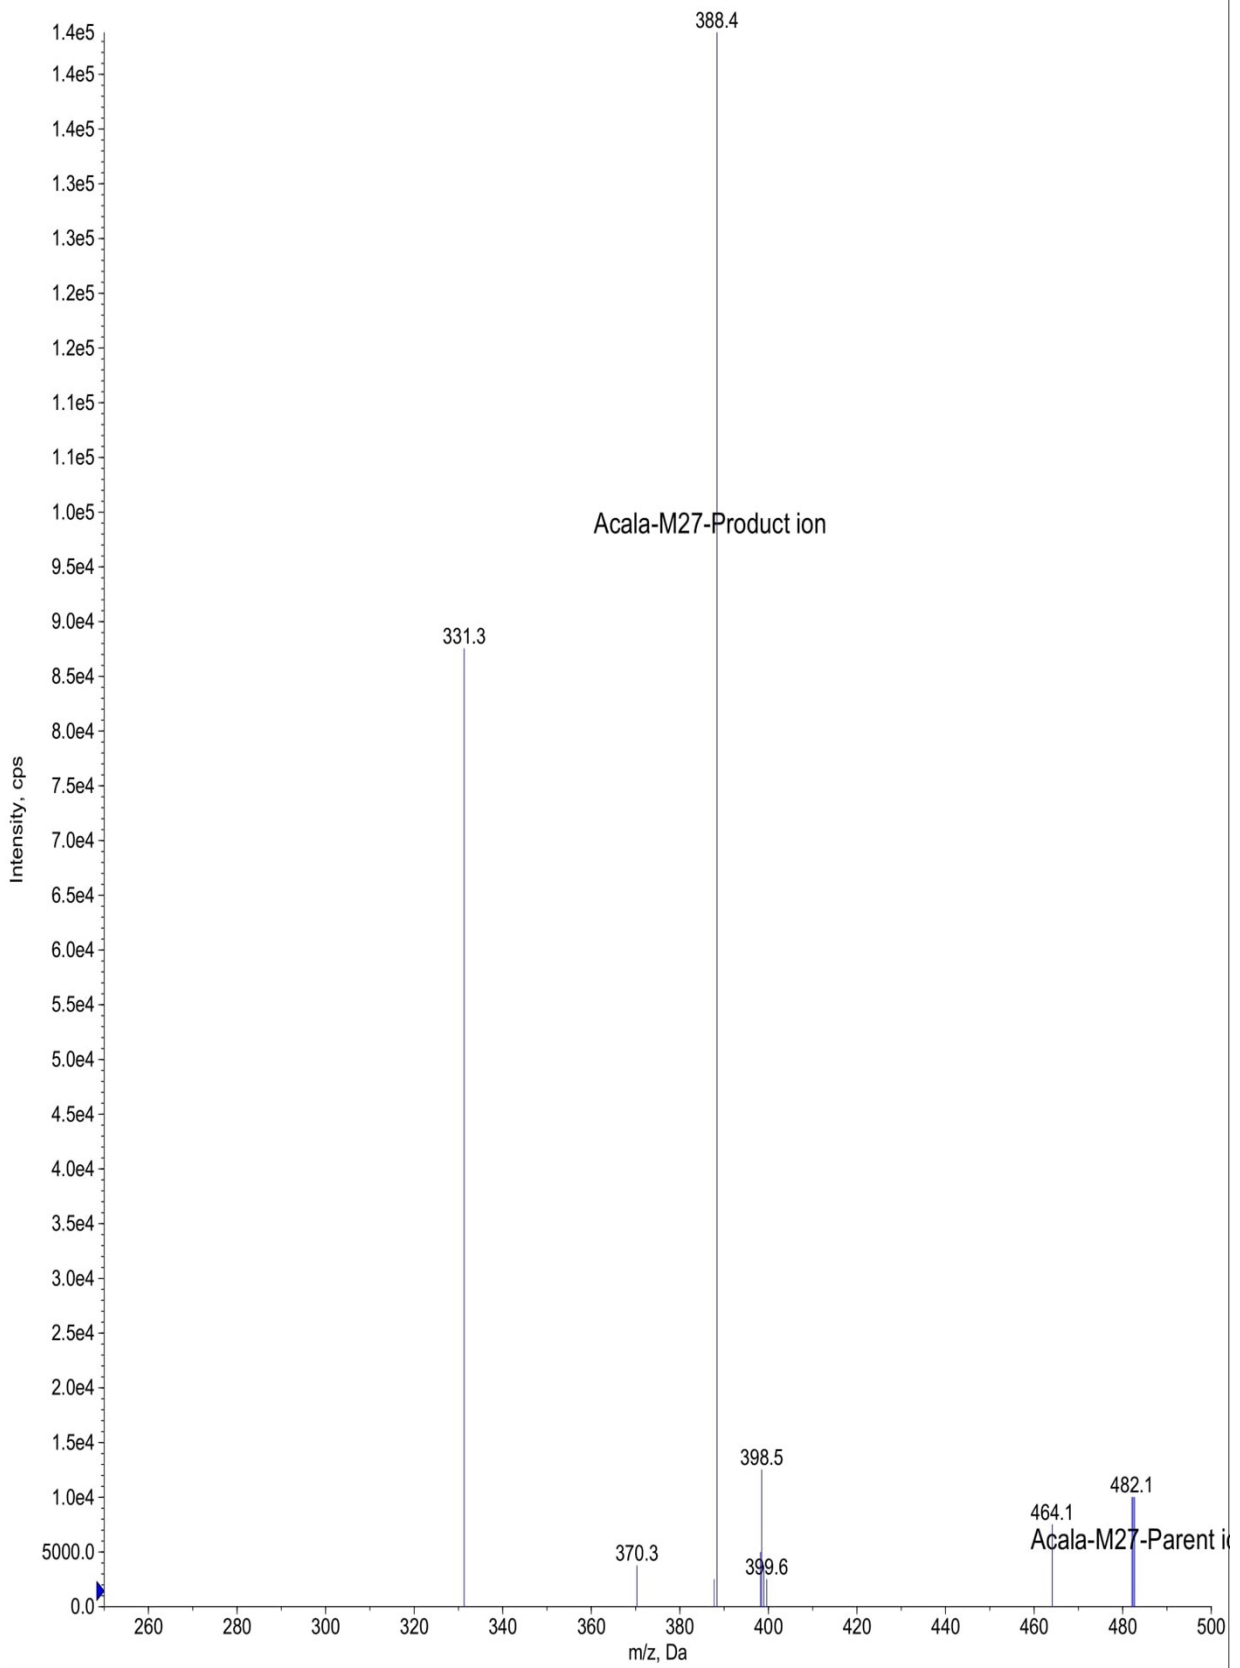

C)

■ +MS2 (466.20): 0.000 min from Sample 1 (TuneSampleID) of MT20210624144931.wiff (Turbo Spray), ...

Max. 1.4e5 cps.

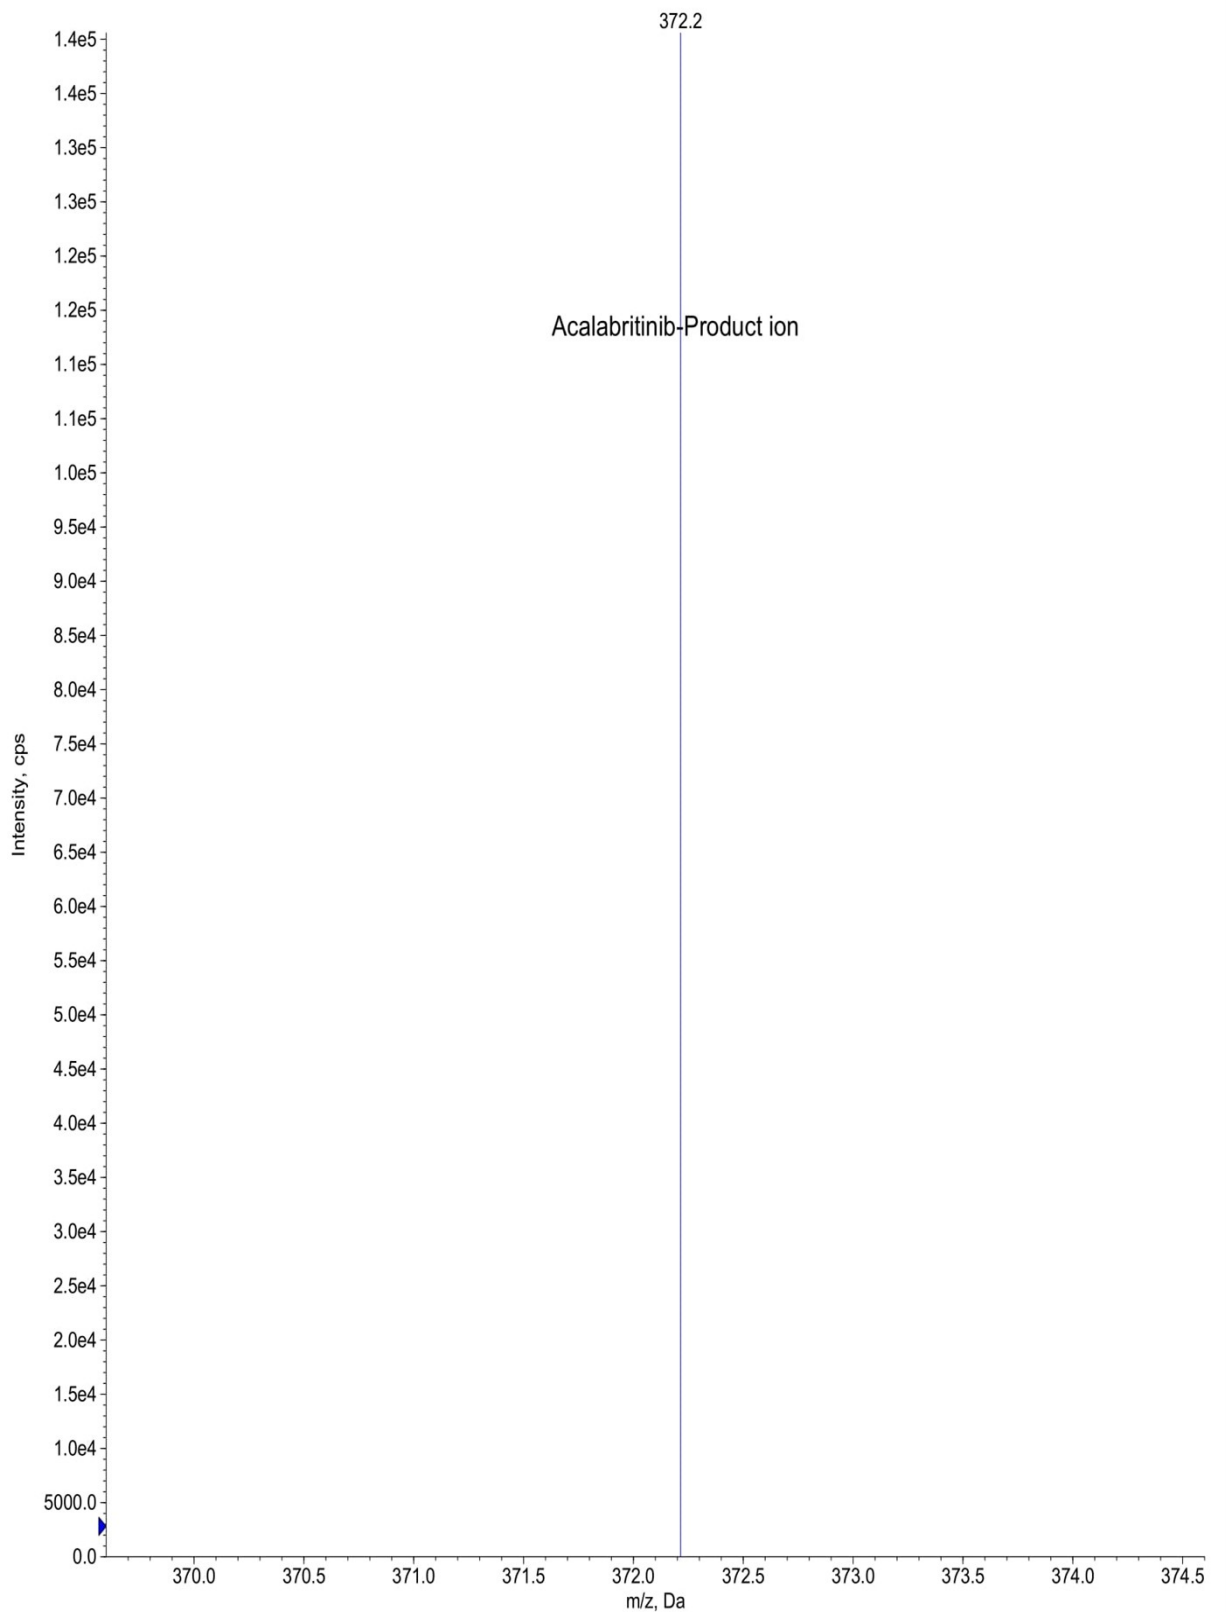

D)

Product ion mass spectrum for A) Acalabrutinib-D4, B) Acalabrutinib-M27-D4, C) Acalabrutinib-M27 and D) Acalabrutinib.
